# Supplementary material
Source: publisher figshare collection journal article supplement (https://acs.figshare.com/ndownloader/files/4483765)
Supplement: Supplementary file 1 [file 4483765]

## Supporting Information

### Microkinetic model for CO oxidation by a CMM

Based on a CMM for CO oxidation, the microkinetic model for small nanoparticles is simply as follows:

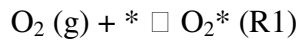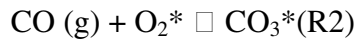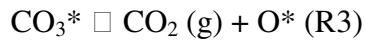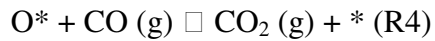

Here, the rate of  $\text{CO}_2$  formation is equal to the maximum of the rate of the reaction R3.

Effect of the reaction R4 is negligible because it is fast and barrierless. Assuming that the first two reactions are in equilibrium, therefore the rate of R1 and R2 is as following:

$$\text{rate}(\text{R1}) = k_1^+ p(\text{O}_2) \theta_* - k_1^- \theta_{\text{O}_2} \rightarrow \theta_{\text{O}_2} = K_1 p(\text{O}_2) \theta_*$$

$$\text{rate(R2)} = k_2^+ p(\text{CO}) \theta_{\text{O}_2} - k_2^- \theta_{\text{CO}_3} \rightarrow \theta_{\text{CO}_3} = K_2 p(\text{CO}) K_1 p(\text{O}_2) \theta_*$$

Finally, the rate of CO<sub>2</sub> formation,  $\text{rate(R3)}^{\text{max}}$ , is as follows:

$$\text{rate(R3)}^{\text{max}} = k_3^+ \theta_{\text{CO}_3} = k_3^+ K_1 K_2 p(\text{CO}) p(\text{O}_2) \theta_*$$

where  $K_1$  and  $K_2$  are the equilibrium constants for R1 and R2,  $p(\text{CO})$  and  $p(\text{O}_2)$  are the partial pressures of CO and O<sub>2</sub>.  $k_i^+$  and  $k_i^-$  represents the forward and the backward reaction constant for Ri, respectively.

Because the sum of the coverage of adsorbed O<sub>2</sub>, CO<sub>3</sub> and free adsorption sites should be equal to 1, we can numerically derive  $\theta_*$  from  $\theta_{\text{O}_2}$  and  $\theta_{\text{CO}_3}$ :

$$\theta_{\text{O}_2} + \theta_{\text{CO}_3} + \theta_* = 1 \rightarrow \theta_* = \frac{1}{(K_1 p(\text{O}_2) + K_1 p(\text{O}_2) K_2 p(\text{CO}) + 1)}$$

where  $\theta_{\text{O}_2}$ ,  $\theta_{\text{CO}_3}$ , and  $\theta_*$  are the coverage of adsorbed O<sub>2</sub>, CO<sub>3</sub> on nanoparticles, and free sites of the surface.

Note that the reaction R1 and R2 concerns the adsorption of O<sub>2</sub> and CO, respectively.

Therefore, the rate constants K<sub>1</sub> and K<sub>2</sub> are,

$$K_1 = \exp\left(\frac{-\Delta G1}{kT}\right) = \exp\left(\frac{-(\Delta E1 - T\Delta S1)}{kT}\right)$$

$\Delta E1$  = Energy of O<sub>2</sub> adsorption

$\Delta S1$  = Entropy change involved in O<sub>2</sub> adsorption

and

$$K_2 = \exp\left(\frac{-\Delta G2}{kT}\right) = \exp\left(\frac{-(\Delta E2 - T\Delta S2)}{kT}\right)$$

$\Delta E2$  = Energy of CO adsorption (CLI formation)

$\Delta S2$  = Entropy change involved in O<sub>2</sub> adsorption

For R3, the maximum rate can be obtained as follows:

$$\text{rate(R3)}^{\max} = k_3^+ \theta_{\text{CO}_3} = k_3^+ K_1 K_2 p(\text{CO}) p(\text{O}_2) \theta_*$$

where,

$$k_3^+ = \frac{kT}{h} \exp\left(\frac{-\Delta G_3^+}{kT}\right) = \frac{kT}{h} \exp\left(\frac{-(E_{de} - T\Delta S_3^+)}{kT}\right)$$

$E_{de}$  = Energy of desorption of CO<sub>2</sub> molecule

$$\Delta S_3^+ = 0$$

Sabatier activity (SA) of nanoparticles mentioned in this study was calculated with the

$\text{rate(R3)}^{\max}$  as follows:

$$SA = kT \ln \left( \frac{\text{rate(R3)}^{\max}}{h/kT} \right)$$

at T=273 K, p(CO)=0.01 bar, and p(O<sub>2</sub>)=0.21 bar.
